# Supplementary material for: Cell death of spinal cord ED1+ cells in a rat model of multiple sclerosis
Source: PeerJ. 2015 Aug 13;3:e1189. doi: 10.7717/peerj.1189 (PMC4581773; doi:10.7717/peerj.1189)
Supplement: Data S1 [file peerj-03-1189-s001.xlsx]

## Sheet: Fig 1 EAE
		day p.i.	8	9	10	11	12	13	14	15	16	17	18	19	20	21	22	23	24	25	26	27	28	29	30
		1	0	0	1	1.5	3	2	1	1	0.5	1	0.5	0.5	0.5	1	1	1	1	1	0.5	0.5	0	0	0
		2	0	0	0	1	2	1	1	1	0.5	1	0.5	0.5	0.5	0	0	0	0.5	1	0.5	0	0	0	0
		3	0	0	1	3	3.5	3.5	1.5	1	0.5	0.5	0.5	0	0	0	2.5	2	1.5	0.5	0	0.5	0	0	0
		4	0	0	1	2	3	3.5	2.5	1.5	1	1	1	1	0.5	0.5	0.5	1	1	1	0.5	0	0	0	0
		5	0	0.5	1	3	3.5	3.5	1.5	1	1	0	0	0	0	1	1.5	1.5	1	1	0.5	0.5	0.5	1	0.5
		6	0	0	0	1.5	2	1.5	1.5	3	3	1	0	0	0	1	1.5	2.5	2.5	1	0.5	1	0.5	0.5	0
		7	0	1	1.5	3	2	1.5	1	1	1	0	0	0	0	1	1	1	1.5	1	1	1	0	0	0
		8	0	0	0.5	1	1.5	2	3	0.5	1	0	0	0	0	0	0.5	1	0.5	1	0.5	0.5	0	0	0
		9	0	0	0	2	3	3	1.5	1	0.5	0	0	0	0	0	0	1	1	0	0	0	0	0	0
			0	0.166667	0.666667	2	2.61111	2.38889	1.61111	1.22222	1	0.5	0.277778	0.222222	0.166667	0.5	0.944444	1.22222	1.16667	0.833333	0.444444	0.444444	0.111111	0.166667	0.0555556
			0	0.353553	0.559017	0.829156	0.740683	0.993031	0.697217	0.712	0.790569	0.5	0.363242	0.363242	0.25	0.5	0.807947	0.712	0.612372	0.353553	0.300463	0.390868	0.220479	0.353553	0.166667
			0	0.117851	0.186339	0.276385	0.246894	0.33101	0.232406	0.237333	0.263523	0.166667	0.121081	0.121081	0.0833333	0.166667	0.269316	0.237333	0.204124	0.117851	0.100154	0.130289	0.0734931	0.117851	0.0555556
		day p.i.	8	9	10	11	12	13	14	15	16	17	18	19	20	21	22	23	24	25	26	27	28	29	30
		mean	0	0.166667	0.666667	2	2.61111	2.38889	1.61111	1.22222	1	0.5	0.277778	0.222222	0.166667	0.5	0.944444	1.22222	1.16667	0.833333	0.444444	0.444444	0.111111	0.166667	0.0555556
		SE	0	0.117851	0.186339	0.276385	0.246894	0.33101	0.232406	0.237333	0.263523	0.166667	0.121081	0.121081	0.0833333	0.166667	0.269316	0.237333	0.204124	0.117851	0.100154	0.130289	0.0734931	0.117851	0.0555556

## Sheet: Fig 2 Tbl 1 ED1
%ED1	all	WM	GM	non-INF	INF	WM non-INF	WM INF	GM non-INF	GM INF
	0	0	0	0	6.12245	0	6.55738	0	6.12245
	0	4	0	0	6.55738	4	10.9375	0	9.52381
	0	5	4.7619	0	9.52381	5	14.8936	4.7619	13.3333
	4	5.55556	6.12245	4	10.9375	5.55556	18.1818	6.66667	13.5593
	4.7619	6.55738	6.66667	4.7619	13.3333	6.66667	22.5	10.3448	14.2857
	5	6.66667	9.52381	5	13.5593	10.3448	22.9167	15.3846	15.1515
	5.55556	10.3448	10.3448	5.55556	14.2857	10.5263	23.6364	15.3846	15.1515
	6.12245	10.5263	13.3333	6.66667	14.8936	12.5	30.7692	15.7895	16.129
	6.55738	10.9375	13.5593	6.66667	15.1515	12.9032	30.9091	16.6667	17.2414
	6.66667	12.5	14.2857	10.3448	15.1515	14.2857	33.3333	18.1818	18.5185
	6.66667	12.9032	15.1515	10.3448	16.129	16.6667	34.1176	19.0476	21.7391
	9.52381	14.2857	15.1515	10.5263	17.2414	17.6471	35.7143	20	26.087
	10.3448	14.8936	15.3846	12.5	18.1818	18.75	36.1702	21.0526	31.0345
	10.3448	16.6667	15.3846	12.9032	18.5185	20.6897	37.8788	21.875	32.2581
	10.5263	17.6471	15.7895	14.2857	21.7391	21.4286	39.6226	23.8095	34.6154
	10.9375	18.1818	16.129	15.3846	22.5	22.2222	42.2222	23.8095	35.5556
	12.5	18.75	16.6667	15.3846	22.9167	22.2222	42.4242	25	35.9375
	12.9032	20.6897	17.2414	15.7895	23.6364	23.3333	44.9275	25	36.1111
	13.3333	21.4286	18.1818	16.6667	26.087	23.8095	45.2381	25	36.5854
	13.5593	22.2222	18.5185	16.6667	30.7692	24.1379	46.875	26.3158	36.9565
	14.2857	22.2222	19.0476	17.6471	30.9091	24.2424	47.0588	26.3158	39.5833
	14.2857	22.5	20	18.1818	31.0345	25	49.1803	26.8293	41.8182
	14.8936	22.9167	21.0526	18.75	32.2581	25	50.9804	27.2727	42.6471
	15.1515	23.3333	21.7391	19.0476	33.3333	26.087	51.2195	27.2727	45.7831
	15.1515	23.6364	21.875	20	34.1176	27.2727	51.4706	28	46.8085
	15.3846	23.8095	23.8095	20.6897	34.6154	28.5714	51.7241	28.5714	47.0588
	15.3846	24.1379	23.8095	21.0526	35.5556	30	57.1429	29.1667	47.0588
	15.7895	24.2424	25	21.4286	35.7143	30.4348	57.5342	31.25	47.3684
	16.129	25	25	21.875	35.9375	32.1429	57.7778	31.8182	50
	16.6667	25	25	22.2222	36.1111	33.3333	58	33.3333	50
	16.6667	26.087	26.087	22.2222	36.1702	33.3333	59.2593	40	50
	17.2414	27.2727	26.3158	23.3333	36.5854	34.4828	68.9655	41.1765	50
	17.6471	28.5714	26.3158	23.8095	36.9565	35.2941	75	46.1538	51.8519
	18.1818	30	26.8293	23.8095	37.8788	35.7143	76.4706	46.6667	53.3333
	18.1818	30.4348	27.2727	23.8095	39.5833	35.7143	85.2941	47.0588	54.902
	18.5185	30.7692	27.2727	24.1379	39.6226	36.3636	96.3636	50	61.5385
	18.75	30.9091	28	24.2424	41.8182	37.5			62.2642
	19.0476	32.1429	28.5714	25	42.2222	42.1053			66
	20	33.3333	29.1667	25	42.4242	47.0588			66.6667
	20.6897	33.3333	31.0345	25	42.6471	47.8261			70.9677
	21.0526	33.3333	31.25	25	44.9275	48.3871			76.1905
	21.4286	34.1176	31.8182	25	45.2381	50			76.3158
	21.7391	34.4828	32.2581	26.087	45.7831	50
	21.875	35.2941	33.3333	26.3158	46.8085	55
	22.2222	35.7143	34.6154	26.3158	46.875	56.25
	22.2222	35.7143	35.5556	26.8293	47.0588	60.6061
	22.5	35.7143	35.9375	27.2727	47.0588	78.5714
	22.9167	36.1702	36.1111	27.2727	47.0588	86.9565
	23.3333	36.3636	36.5854	27.2727	47.3684
	23.6364	37.5	36.9565	28	49.1803
	23.8095	37.8788	39.5833	28.5714	50
	23.8095	39.6226	40	28.5714	50
	23.8095	42.1053	41.1765	29.1667	50
	24.1379	42.2222	41.8182	30	50
	24.2424	42.4242	42.6471	30.4348	50.9804
	25	44.9275	45.7831	31.25	51.2195
	25	45.2381	46.1538	31.8182	51.4706
	25	46.875	46.6667	32.1429	51.7241
	25	47.0588	46.8085	33.3333	51.8519
	25	47.0588	47.0588	33.3333	53.3333
	26.087	47.8261	47.0588	33.3333	54.902
	26.087	48.3871	47.0588	34.4828	57.1429
	26.3158	49.1803	47.3684	35.2941	57.5342
	26.3158	50	50	35.7143	57.7778
	26.8293	50	50	35.7143	58
	27.2727	50.9804	50	36.3636	59.2593
	27.2727	51.2195	50	37.5	61.5385
	27.2727	51.4706	50	40	62.2642
	28	51.7241	51.8519	41.1765	66
	28.5714	55	53.3333	42.1053	66.6667
	28.5714	56.25	54.902	46.1538	68.9655
	29.1667	57.1429	61.5385	46.6667	70.9677
	30	57.5342	62.2642	47.0588	75
	30.4348	57.7778	66	47.0588	76.1905
	30.7692	58	66.6667	47.8261	76.3158
	30.9091	59.2593	70.9677	48.3871	76.4706
	31.0345	60.6061	76.1905	50	85.2941
	31.25	68.9655	76.3158	50	96.3636
	31.8182	75		50
	32.1429	76.4706		55
	32.2581	78.5714		56.25
	33.3333	85.2941		60.6061
	33.3333	86.9565		78.5714
	33.3333	96.3636		86.9565
	33.3333
	34.1176
	34.4828
	34.6154
	35.2941
	35.5556
	35.7143
	35.7143
	35.7143
	35.9375
	36.1111
	36.1702
	36.3636
	36.5854
	36.9565
	37.5
	37.8788
	39.5833
	39.6226
	40
	41.1765
	41.8182
	42.1053
	42.2222
	42.4242
	42.6471
	44.9275
	45.2381
	45.7831
	46.1538
	46.6667
	46.8085
	46.875
	47.0588
	47.0588
	47.0588
	47.0588
	47.0588
	47.3684
	47.8261
	48.3871
	49.1803
	50
	50
	50
	50
	50
	50
	50
	50.9804
	51.2195
	51.4706
	51.7241
	51.8519
	53.3333
	54.902
	55
	56.25
	57.1429
	57.5342
	57.7778
	58
	59.2593
	60.6061
	61.5385
	62.2642
	66
	66.6667
	68.9655
	70.9677
	75
	76.1905
	76.3158
	76.4706
	78.5714
	85.2941
	86.9565
	96.3636
	0	0	0	0	0	0	0	0	0
	0	0	4.34783	0	11.1111	0	15.3846	4.34783	11.1111
	0	0	4.54545	0	15.3846	0	15.3846	4.54545	15.3846
	0	0	6.45161	0	15.3846	0	18.6047	6.45161	20
	4.34783	5.26316	7.14286	4.34783	18.6047	5.26316	20	7.14286	21.0526
	4.54545	5.88235	7.14286	4.54545	20	5.88235	21.2766	7.14286	22.2222
	5.26316	6.25	7.14286	5.26316	20	6.25	23.2558	7.69231	22.449
	5.88235	7.14286	7.69231	5.88235	21.0526	7.14286	23.7288	7.69231	22.9508
	6.25	8.33333	7.69231	6.25	21.2766	8.33333	26.6667	9.52381	26.1905
	6.45161	9.09091	9.52381	6.45161	22.2222	9.09091	27.7778	14.2857	27.5
	7.14286	9.09091	11.1111	7.14286	22.449	9.09091	32.3077	14.2857	27.7778
	7.14286	9.52381	14.2857	7.14286	22.9508	9.52381	35.7143	17.8571	29.4872
	7.14286	10.5263	14.2857	7.14286	23.2558	10.5263	35.8491	20	32.4324
	7.14286	11.1111	14.2857	7.14286	23.7288	11.1111	36.9863	21.0526	33.3333
	7.69231	11.1111	18.5185	7.69231	26.1905	11.1111	38	21.875	35
	7.69231	11.4286	20	7.69231	26.6667	11.4286	38	25	39.6226
	8.33333	11.7647	20	8.33333	27.5	11.7647	38.8235	25	41.4634
	9.09091	11.7647	21.0526	9.09091	27.7778	11.7647	41.4634	25.9259	42.8571
	9.09091	12.5	21.0526	9.09091	29.4872	12.5	44.4444	25.9259	48.6486
	9.52381	13.0435	21.875	9.52381	32.3077	13.0435	45	26.087
	9.52381	14.2857	22.2222	9.52381	32.4324	14.2857	46.6667	26.3158
	10.5263	15.3846	22.449	10.5263	33.3333	14.2857	47.619	27.2727
	11.1111	15.3846	22.9508	11.1111	35	16.2162	47.7273	27.7778
	11.1111	16.2162	25	11.1111	35.7143	16.6667	51.25	28.5714
	11.1111	16.6667	25	11.4286	35.8491	17.8571	53.2258	29.4118
	11.4286	17.8571	25	11.7647	36.9863	18.5185	56.1798	29.6296
	11.7647	18.5185	25.9259	11.7647	38	19.0476	59.6491	29.6296
	11.7647	18.6047	25.9259	12.5	38	20	61.3333	30
	12.5	19.0476	26.087	13.0435	38.8235	21.6216	67.9245	31.25
	13.0435	20	26.1905	14.2857	39.6226	22.5		36.6667
	14.2857	20	26.3158	14.2857	41.4634	23.0769		40
	14.2857	21.2766	26.9231	14.2857	42.8571	23.0769		59.2593
	14.2857	21.6216	27.2727	14.2857	44.4444	23.3333
	14.2857	22.5	27.5	16.2162	45	24.1379
	15.3846	23.0769	27.7778	16.6667	46.6667	25
	15.3846	23.0769	29.4118	17.8571	47.619	25
	16.2162	23.2558	29.4872	18.5185	47.7273	25
	16.6667	23.3333	29.6296	18.5185	48.6486	26.087
	17.8571	23.7288	29.6296	19.0476	51.25	27.027
	18.5185	24.1379	30	20	53.2258	28.5714
	18.5185	25	30	20	56.1798	28.5714
	18.6047	25	31.25	21.0526	59.6491	30
	19.0476	25	32.4324	21.6216	61.3333	32.3529
	20	26.087	33.3333	21.875	67.9245	33.3333
	20	26.6667	35	22.5		35
	20	27.027	36.3636	23.0769		36.3636
	20	27.7778	39.6226	23.0769		36.6667
	21.0526	28.5714	40	23.3333		40.7407
	21.0526	28.5714	40	24.1379		42.1053
	21.2766	32.3077	42.8571	25		45
	21.6216	32.3529	48.6486	25		45
	21.875	33.3333	50	25		47.7273
	22.2222	35	50	25		48.3871
	22.449	35.7143	50	25		48.7805
	22.5	35.8491	59.2593	25		50
	22.9508	36.6667		25.9259		50
	23.0769	36.9863		25.9259		50
	23.0769	38		26.087		53.2258
	23.2558	38		26.087		55.5556
	23.3333	38.8235		26.3158		63.6364
	23.7288	40.7407		26.9231
	24.1379	41.4634		27.027
	25	42.1053		27.2727
	25	44.4444		27.7778
	25	45		28.5714
	25	45		28.5714
	25	46.6667		29.4118
	25	47.619		29.6296
	25.9259	47.7273		29.6296
	25.9259	48.3871		30
	26.087	48.7805		30
	26.087	51.25		31.25
	26.1905	53.2258		32.3529
	26.3158	55.5556		33.3333
	26.6667	56.1798		35
	26.9231	59.6491		36.3636
	27.027	61.3333		36.6667
	27.2727	63.6364		40
	27.5	67.9245		40.7407
	27.7778			42.1053
	27.7778			45
	28.5714			45
	28.5714			47.7273
	29.4118			48.3871
	29.4872			48.7805
	29.6296			50
	29.6296			50
	30			50
	30			53.2258
	31.25			55.5556
	32.3077			59.2593
	32.3529			63.6364
	32.4324
	33.3333
	33.3333
	35
	35
	35.7143
	35.8491
	36.3636
	36.6667
	36.9863
	38
	38
	38.8235
	39.6226
	40
	40
	40.7407
	41.4634
	42.1053
	42.8571
	44.4444
	45
	45
	46.6667
	47.619
	47.7273
	48.3871
	48.6486
	48.7805
	50
	50
	50
	51.25
	53.2258
	55.5556
	56.1798
	59.2593													ED1
	59.6491												all		infiltrate		non-infiltrated
	61.3333											WM	32	1.5	41.3	2.3	26.9	1.7
	63.6364											GM	29.7	1.4	35.8	2.3	23.3	1.5
	67.9245
% ED1	all	WM	GM	non-INF	INF	WM non-INF	WM INF	GM non-INF	GM INF
n	295	163	133	176	122	108	65	68	61
mean	31.0409	31.9658	29.674	25.458	39.2002	26.8845	41.2848	23.2735	35.7957
sd	17.9971	19.2549	16.4546	15.6636	18.3019	17.3813	18.7524	12.5313	17.9232
se	1.04783	1.50816	1.42679	1.18069	1.65698	1.67252	2.32595	1.51964	2.29482

## Sheet: Fig3,4 Tbl2,3 TUNEL
% TUNEL	all	WM	GM	non-INF	INF	WM non-INF	WM INF	GM non-INF	GM INF		% ED1 in TUNEL	all	WM	GM	non-INF	INF	WM non-INF	WM INF	GM non-INF	GM INF		% TUNEL in ED1	all	WM	GM	non-INF	INF	WM non-INF	WM INF	GM non-INF	GM INF		%ED1	all	WM	GM	non-INF	INF	WM non-INF	WM INF	GM non-INF	GM INF
	0	0	0	0	0	0	0	0	0			0	0	0	0	0	0	0	0	0			0	x0	x0	0	0	0	0	0	0			0	0	0	0	6.12245	0	6.55738	0	6.12245
	0	0	0	0	0	0	0	0	0			0	0	0	0	0	0	0	0	0			0	x0	x0	0	0	0	0	0	0			0	4	0	0	6.55738	4	10.9375	0	9.52381
	0	0	0	0	0	0	0	0	0			0	0	0	0	0	0	0	0	0			0	0	0	0	0	0	0	0	0			0	5	4.7619	0	9.52381	5	14.8936	4.7619	13.3333
	0	0	0	0	0	0	0	0	0			0	0	0	0	0	0	0	0	0			0	0	0	0	0	0	0	0	0			4	5.55556	6.12245	4	10.9375	5.55556	18.1818	6.66667	13.5593
	0	0	0	0	0	0	2.43902	0	0			0	0	0	0	0	0	0	0	0			0	0	0	0	0	0	0	0	0			4.7619	6.55738	6.66667	4.7619	13.3333	6.66667	22.5	10.3448	14.2857
	0	0	0	0	0	0	2.5	0	0			0	0	0	0	0	0	0	0	0			0	0	0	0	0	0	0	0	0			5	6.66667	9.52381	5	13.5593	10.3448	22.9167	15.3846	15.1515
	0	0	0	0	0	0	3.0303	0	0			0	0	0	0	0	0	0	0	0			0	0	0	0	0	0	0	0	0			5.55556	10.3448	10.3448	5.55556	14.2857	10.5263	23.6364	15.3846	15.1515
	0	0	0	0	0	0	4.44444	0	2.5641			0	0	0	0	0	0	0	0	0			0	0	0	0	0	0	3.22581	0	0			6.12245	10.5263	13.3333	6.66667	14.8936	12.5	30.7692	15.7895	16.129
	0	0	0	0	0	0	7.24638	0	2.94118			0	0	0	0	0	0	12.5	0	0			0	0	0	0	0	0	4.7619	0	0			6.55738	10.9375	13.5593	6.66667	15.1515	12.9032	30.9091	16.6667	17.2414
	0	0	0	0	0	0	8.51064	0	3.0303			0	0	0	0	0	0	20	25	10			0	0	0	0	0	0	5.26316	0	0			6.66667	12.5	14.2857	10.3448	15.1515	14.2857	33.3333	18.1818	18.5185
	0	0	0	0	0	2.94118	10.9375	0	3.33333			0	0	0	0	0	0	28.5714	33.3333	13.3333			0	0	0	0	0	0	6.66667	0	0			6.66667	12.9032	15.1515	10.3448	16.129	16.6667	34.1176	19.0476	21.7391
	0	0	0	0	2.43902	3.44828	12	0	3.44828			0	0	0	0	0	0	30	33.3333	25			0	0	0	0	0	0	7.69231	0	0			9.52381	14.2857	15.1515	10.5263	17.2414	17.6471	35.7143	20	26.087
	0	0	0	0	2.5	3.57143	13.1148	0	3.77358			0	0	0	0	0	0	33.3333	40	25			0	0	0	0	0	0	10	0	0			10.3448	14.8936	15.3846	12.5	18.1818	18.75	36.1702	21.0526	31.0345
	0	0	0	0	2.5641	5.26316	13.3333	0	4			0	0	0	0	0	0	38.4615	46.1538	33.3333			0	0	0	0	0	0	10.3448	0	3.0303			10.3448	16.6667	15.3846	12.9032	18.5185	20.6897	37.8788	21.875	32.2581
	0	2.43902	0	0	2.94118	5.88235	13.3333	0	4.08163			0	0	0	0	0	0	40	50	40			0	0	0	0	0	0	15.5172	0	4			10.5263	17.6471	15.7895	14.2857	21.7391	21.4286	39.6226	23.8095	34.6154
	0	2.5	0	0	3.0303	5.88235	14.0625	0	4.16667			0	0	0	0	0	20	42.8571	50	40			0	0	0	0	0	0	15.625	0	4.16667			10.9375	18.1818	16.129	15.3846	22.5	22.2222	42.2222	23.8095	35.5556
	0	2.94118	0	0	3.0303	6.25	16.1765	5.55556	4.34783			0	0	0	0	0	33.3333	45.4545	88.8889	50			0	0	0	0	0	0	15.7895	0	4.54545			12.5	18.75	16.6667	15.3846	22.9167	22.2222	42.4242	25	35.9375
	0	3.0303	0	0	3.33333	6.25	16.9231	6.25	4.44444			0	0	0	0	10	33.3333	50	100	50			0	0	0	0	0	0	16	0	6.25			12.9032	20.6897	17.2414	15.7895	23.6364	23.3333	44.9275	25	36.1111
	0	3.44828	0	0	3.44828	7.14286	17.0213	7.14286	5.88235			0	0	10	0	12.5	33.3333	50	100	50			0	0	0	0	0	0	19.2308	0	7.40741			13.3333	21.4286	18.1818	16.6667	26.087	23.8095	45.2381	25	36.5854
	0	3.57143	0	0	3.77358	7.14286	20	7.69231	5.88235			0	0	13.3333	0	13.3333	40	50	100	50			0	0	0	0	0	0	20	0	7.69231			13.5593	22.2222	18.5185	16.6667	30.7692	24.1379	46.875	26.3158	36.9565
	0	4.44444	0	0	4	9.09091	21.2121	10	6.38298			0	0	25	0	20	42.8571	50	100	50			0	0	0	0	3.0303	0	20.7547	0	8.33333			14.2857	22.2222	19.0476	17.6471	30.9091	24.2424	47.0588	26.3158	39.5833
	0	5.26316	0	0	4.08163	10	21.8182	11.7647	6.45161			0	0	25	0	25	50	72.7273		66.6667			0	0	0	0	3.22581	4.54545	25	0	9.09091			14.2857	22.5	20	18.1818	31.0345	25	49.1803	26.8293	41.8182
	0	5.88235	0	0	4.16667	10.3448	22.4138	14.2857	7.01754			0	0	25	0	25	50	81.4815		75			0	0	0	0	4	5.55556	25.7143	0	10.3448			14.8936	22.9167	21.0526	18.75	32.2581	25	50.9804	27.2727	42.6471
	0	5.88235	2.5641	0	4.34783	10.3448	22.9167	16	10.5263			0	12.5	33.3333	0	28.5714	50	81.8182		75			0	0	0	0	4.16667	9.09091	27.5862	11.1111	10.3448			15.1515	23.3333	21.7391	19.0476	33.3333	26.087	51.2195	27.2727	45.7831
	0	6.25	2.94118	0	4.44444	11.1111	23.5294	18.1818	11.3636			0	20	33.3333	20	30	50	91.6667		75			0	0	0	0	4.54545	10	40	14.2857	10.5263			15.1515	23.6364	21.875	20	34.1176	27.2727	51.4706	28	46.8085
	0	6.25	3.0303	0	4.44444	12.5	23.8095	18.75	14.5455			0	20	33.3333	25	33.3333	60	100		87.5			0	0	0	0	4.7619	14.2857	43.3333	25	12.5			15.3846	23.8095	23.8095	20.6897	34.6154	28.5714	51.7241	28.5714	47.0588
	0	7.14286	3.33333	2.94118	5.88235	12.5	26.4706	20	15.873			0	28.5714	40	33.3333	33.3333	71.4286	100		92			0	0	0	0	5.26316	15	47.0588	28.5714	12.5			15.3846	24.1379	23.8095	21.0526	35.5556	30	57.1429	29.1667	47.0588
	0	7.14286	3.44828	3.44828	5.88235	12.5	27.451	20.6897	16			0	30	40	33.3333	38.4615	75	100		95			0	0	0	0	6.25	16.6667	50	40	13.0435			15.7895	24.2424	25	21.4286	35.7143	30.4348	57.5342	31.25	47.3684
	0	7.24638	3.77358	3.57143	6.38298	12.9032	27.9412	23.6842	16.129			0	33.3333	40	33.3333	40	100	100		100			0	3.22581	0	0	6.66667	20	53.8462	42.8571	13.0435			16.129	25	25	21.875	35.9375	32.1429	57.7778	31.8182	50
	0	8.51064	4	5.26316	6.45161	14.2857	30	23.8095	16.9492			0	33.3333	46.1538	33.3333	40	100	100		100			0	4.54545	0	0	7.40741	25	57.1429	50	13.3333			16.6667	25	25	22.2222	36.1111	33.3333	58	33.3333	50
	0	9.09091	4.08163	5.55556	7.01754	15	34.2466	25	17.3913			0	33.3333	50	33.3333	40	100	100		100			0	4.7619	0	0	7.69231	27.5	58.8235	66.6667	13.6364			16.6667	26.087	26.087	22.2222	36.1702	33.3333	59.2593	40	50
	0	10	4.16667	5.88235	7.24638	16.129	36.3636	26.8293	18.75			0	33.3333	50	40	42.8571	100	100		100			0	5.26316	0	0	7.69231	30	73.3333	80	20			17.2414	27.2727	26.3158	23.3333	36.5854	34.4828	68.9655	41.1765	50
	0	10.3448	4.34783	5.88235	8.51064	16.6667	38.2353	30	19.0476			0	38.4615	50	40	45.4545	100			100			0	5.55556	0	0	8.33333	33.3333	76.1905	85.7143	22.2222			17.6471	28.5714	26.3158	23.8095	36.9565	35.2941	75	46.1538	51.8519
	0	10.3448	4.44444	6.25	10.5263	16.6667	40	31.5789	19.5652			0	40	50	42.8571	50	100			100			0	6.66667	0	0	9.09091	33.3333	78.5714	100	24.2424			18.1818	30	26.8293	23.8095	37.8788	35.7143	76.4706	46.6667	53.3333
	0	10.9375	5.55556	6.25	10.9375	17.8571	44.2623	38.0952	20.8333			0	40	50	46.1538	50	100			100			0	7.69231	0	0	10	42.8571	92.3077	100	25			18.1818	30.4348	27.2727	23.8095	39.5833	35.7143	85.2941	47.0588	54.902
	0	11.1111	5.88235	6.25	11.3636	18.5185	45.283	54.1667	24.0964			0	42.8571	50	50	50	100						0	9.09091	0	0	10.3448	50	100	100	50			18.5185	30.7692	27.2727	24.1379	39.6226	36.3636	96.3636	50	61.5385
	0	12	5.88235	7.14286	12	20			27.451			0	42.8571	50	50	50	100						0	10	3.0303	0	10.3448	50			50			18.75	30.9091	28	24.2424	41.8182	37.5			62.2642
	2.43902	12.5	6.25	7.14286	13.1148	20.6897			27.5862			0	45.4545	66.6667	50	50							0	10	4	0	10.3448	55.5556			57.5			19.0476	32.1429	28.5714	25	42.2222	42.1053			66
	2.5	12.5	6.38298	7.14286	13.3333	20.8333			30.7692			0	50	75	50	50							0	10.3448	4.16667	0	10.5263	66.6667			60			20	33.3333	29.1667	25	42.4242	47.0588			66.6667
	2.5641	12.5	6.45161	7.69231	13.3333	21.0526			31.7073			0	50	75	50	50							0	14.2857	4.54545	0	12.5	66.6667			65.7895			20.6897	33.3333	31.0345	25	42.6471	47.8261			70.9677
	2.94118	12.9032	7.01754	9.09091	14.0625	21.2121			33.3333			0	50	75	50	50							0	15	6.25	0	12.5	66.6667			77.7778			21.0526	33.3333	31.25	25	44.9275	48.3871			76.1905
	2.94118	13.1148	7.14286	10	14.5455	21.4286			43.8596			10	50	87.5	60	50							0	15.5172	7.40741	0	13.0435	71.4286			83.3333			21.4286	34.1176	31.8182	25	45.2381	50			76.3158
	3.0303	13.3333	7.69231	10	15.873	21.7391						12.5	50	88.8889	71.4286	66.6667							0	15.625	7.69231	0	13.0435	71.4286						21.7391	34.4828	32.2581	26.087	45.7831	50
	3.0303	13.3333	10	10.3448	16	23.3333						13.3333	50	92	75	72.7273							0	15.7895	8.33333	0	13.3333	75						21.875	35.2941	33.3333	26.3158	46.8085	55
	3.33333	14.0625	10.5263	10.3448	16.129	23.913						20	50	95	88.8889	75							0	16	9.09091	4.54545	13.6364	75						22.2222	35.7143	34.6154	26.3158	46.875	56.25
	3.44828	14.2857	11.3636	11.1111	16.1765	33.3333						20	50	100	100	75							0	16.6667	10.3448	5.55556	15.5172	75						22.2222	35.7143	35.5556	26.8293	47.0588	60.6061
	3.44828	15	11.7647	11.7647	16.9231	35.7143						25	60	100	100	75							0	19.2308	10.3448	9.09091	15.625	100						22.5	35.7143	35.9375	27.2727	47.0588	78.5714
	3.57143	16.129	14.2857	12.5	16.9492	41.1765						25	71.4286	100	100	81.4815							0	20	10.5263	10	15.7895							22.9167	36.1702	36.1111	27.2727	47.0588	86.9565
	3.77358	16.1765	14.5455	12.5	17.0213							25	72.7273	100	100	81.8182							0	20	11.1111	11.1111	16							23.3333	36.3636	36.5854	27.2727	47.3684
	4	16.6667	15.873	12.5	17.3913							28.5714	75	100	100	87.5							0	20.7547	12.5	14.2857	19.2308							23.6364	37.5	36.9565	28	49.1803
	4.08163	16.6667	16	12.9032	18.75							30	81.4815	100	100	91.6667							0	25	12.5	14.2857	20							23.8095	37.8788	39.5833	28.5714	50
	4.16667	16.9231	16	14.2857	19.0476							33.3333	81.8182	100	100	92							0	25	13.0435	15	20							23.8095	39.6226	40	28.5714	50
	4.34783	17.0213	16.129	14.2857	19.5652							33.3333	91.6667	100	100	95							0	25.7143	13.0435	16.6667	20.7547							23.8095	42.1053	41.1765	29.1667	50
	4.44444	17.8571	16.9492	15	20							33.3333	100	100	100	100							0	27.5	13.3333	20	22.2222							24.1379	42.2222	41.8182	30	50
	4.44444	18.5185	17.3913	16	20.8333							33.3333	100	100	100	100							0	27.5862	13.6364	25	24.2424							24.2424	42.4242	42.6471	30.4348	50.9804
	5.26316	20	18.1818	16.129	21.2121							33.3333	100	100	100	100							0	30	14.2857	25	25							25	44.9275	45.7831	31.25	51.2195
	5.55556	20	18.75	16.6667	21.8182							33.3333	100		100	100							0	33.3333	20	27.5	25							25	45.2381	46.1538	31.8182	51.4706
	5.88235	20.6897	18.75	16.6667	22.4138							33.3333	100		100	100							0	33.3333	22.2222	28.5714	25.7143							25	46.875	46.6667	32.1429	51.7241
	5.88235	20.8333	19.0476	17.8571	22.9167							38.4615	100			100							0	40	24.2424	30	27.5862							25	47.0588	46.8085	33.3333	51.8519
	5.88235	21.0526	19.5652	18.1818	23.5294							40	100			100							0	42.8571	25	33.3333	40							25	47.0588	47.0588	33.3333	53.3333
	5.88235	21.2121	20	18.5185	23.8095							40	100			100							0	43.3333	25	33.3333	43.3333							26.087	47.8261	47.0588	33.3333	54.902
	6.25	21.2121	20.6897	18.75	24.0964							40	100			100							0	47.0588	28.5714	40	47.0588							26.087	48.3871	47.0588	34.4828	57.1429
	6.25	21.4286	20.8333	20	26.4706							40	100			100							0	50	40	42.8571	50							26.3158	49.1803	47.3684	35.2941	57.5342
	6.25	21.7391	23.6842	20	27.451							40	100			100							0	50	42.8571	42.8571	50							26.3158	50	50	35.7143	57.7778
	6.38298	21.8182	23.8095	20.6897	27.451							42.8571	100			100							3.0303	50	50	50	50							26.8293	50	50	35.7143	58
	6.45161	22.4138	24.0964	20.6897	27.5862							42.8571	100			100							3.22581	53.8462	50	50	53.8462							27.2727	50.9804	50	36.3636	59.2593
	7.01754	22.9167	25	20.8333	27.9412							45.4545	100			100							4	55.5556	50	50	57.1429							27.2727	51.2195	50	37.5	61.5385
	7.14286	23.3333	26.8293	21.0526	30							46.1538	100										4.16667	57.1429	57.5	55.5556	57.5							27.2727	51.4706	50	40	62.2642
	7.14286	23.5294	27.451	21.2121	30.7692							50	100										4.54545	58.8235	60	66.6667	58.8235							28	51.7241	51.8519	41.1765	66
	7.14286	23.8095	27.5862	21.4286	31.7073							50											4.54545	66.6667	65.7895	66.6667	60							28.5714	55	53.3333	42.1053	66.6667
	7.24638	23.913	30	21.7391	33.3333							50											4.7619	66.6667	66.6667	66.6667	65.7895							28.5714	56.25	54.902	46.1538	68.9655
	7.69231	26.4706	30.7692	23.3333	34.2466							50											5.26316	66.6667	77.7778	66.6667	73.3333							29.1667	57.1429	61.5385	46.6667	70.9677
	8.51064	27.451	31.5789	23.6842	36.3636							50											5.55556	71.4286	80	71.4286	76.1905							30	57.5342	62.2642	47.0588	75
	9.09091	27.9412	31.7073	23.8095	38.2353							50											6.25	71.4286	83.3333	71.4286	77.7778							30.4348	57.7778	66	47.0588	76.1905
	10	30	33.3333	23.913	40							50											6.66667	73.3333	85.7143	75	78.5714							30.7692	58	66.6667	47.8261	76.3158
	10	33.3333	38.0952	25	43.8596							50											7.40741	75	100	75	83.3333							30.9091	59.2593	70.9677	48.3871	76.4706
	10.3448	34.2466	43.8596	26.8293	44.2623							50											7.69231	75	100	75	92.3077							31.0345	60.6061	76.1905	50	85.2941
	10.3448	35.7143	54.1667	30	45.283							50											7.69231	75		80	100							31.25	68.9655	76.3158	50	96.3636
	10.5263	36.3636		31.5789								50											8.33333	76.1905		85.7143								31.8182	75		50
	10.9375	38.2353		33.3333								50											9.09091	78.5714		100								32.1429	76.4706		55
	11.1111	40		35.7143								50											9.09091	92.3077		100								32.2581	78.5714		56.25
	11.3636	41.1765		38.0952								50											10	100		100								33.3333	85.2941		60.6061
	11.7647	44.2623		41.1765								50											10			100								33.3333	86.9565		78.5714
	12	45.283		54.1667								60											10.3448											33.3333	96.3636		86.9565
	12.5											66.6667											10.3448											33.3333
	12.5											71.4286											10.3448											34.1176
	12.5											72.7273											10.5263											34.4828
	12.9032											75											11.1111											34.6154
	13.1148											75											12.5											35.2941
	13.3333											75											12.5											35.5556
	13.3333											75											13.0435											35.7143
	14.0625											81.4815											13.0435											35.7143
	14.2857											81.8182											13.3333											35.7143
	14.2857											87.5											14.2857											35.9375
	14.5455											88.8889											14.2857											36.1111
	15											91.6667											15											36.1702
	15.873											92											15.5172											36.3636
	16											95											15.625											36.5854
	16											100											15.7895											36.9565
	16.129											100											16											37.5
	16.129											100											16.6667											37.8788
	16.1765											100											19.2308											39.5833
	16.6667											100											20											39.6226
	16.6667											100											20											40
	16.9231											100											20											41.1765
	16.9492											100											20.7547											41.8182
	17.0213											100											22.2222											42.1053
	17.3913											100											24.2424											42.2222
	17.8571											100											25											42.4242
	18.1818											100											25											42.6471
	18.5185											100											25											44.9275
	18.75											100											25											45.2381
	18.75											100											25.7143											45.7831
	19.0476											100											27.5											46.1538
	19.5652											100											27.5862											46.6667
	20											100											28.5714											46.8085
	20											100											30											46.875
	20											100											33.3333											47.0588
	20.6897											100											33.3333											47.0588
	20.6897											100											40											47.0588
	20.8333											100											40											47.0588
	20.8333											100											42.8571											47.0588
	21.0526											100											42.8571											47.3684
	21.2121											100											43.3333											47.8261
	21.2121											100											47.0588											48.3871
	21.4286																						50											49.1803
	21.7391																						50											50
	21.8182																						50											50
	22.4138																						50											50
	22.9167																						50											50
	23.3333																						50											50
	23.5294																						53.8462											50
	23.6842																						55.5556											50
	23.8095																						57.1429											50.9804
	23.8095																						57.5											51.2195
	23.913																						58.8235											51.4706
	24.0964																						60											51.7241
	25																						65.7895											51.8519
	26.4706																						66.6667											53.3333
	26.8293																						66.6667											54.902
	27.451																						66.6667											55
	27.451																						66.6667											56.25
	27.5862																						71.4286											57.1429
	27.9412																						71.4286											57.5342
	30																						73.3333											57.7778
	30																						75											58
	30.7692																						75											59.2593
	31.5789																						75											60.6061
	31.7073																						76.1905											61.5385
	33.3333																						77.7778											62.2642
	33.3333																						78.5714											66
	34.2466																						80											66.6667
	35.7143																						83.3333											68.9655
	36.3636																						85.7143											70.9677
	38.0952																						92.3077											75
	38.2353																						100											76.1905
	40																						100											76.3158
	41.1765																						100											76.4706
	43.8596																						100											78.5714
	44.2623																						100											85.2941
	45.283																																	86.9565
	54.1667																																	96.3636
% TUNEL	all	WM	GM	non-INF	INF	WM non-NF	WM INF	GM non-INF	GM INF		% ED1 in TUNEL	all	WM	GM	non-INF	INF	WM non-INF	WM INF	GM non-INF	GM INF		% TUNEL in ED1	all	WM	GM	non-INF	INF	WM non-INF	WM INF	GM non-INF	GM INF		% ED1	all	WM	GM	non-INF	INF	WM non-NF	WM INF	GM non-INF	GM INF
n	162	84	78	84	78	48	36	36	42		n	125	69	56	58	67	37	32	21	35		n	159	80	75	83	78	47	35	36	42		n	162	84	78	84	78	48	36	36	42
mean	13.1645	14.7101	11.5	11.7154	14.725	11.9712	18.3618	11.3743	11.6077		mean	43.9816	43.8863	44.099	39.2413	48.0851	40.7915	47.4647	36.51	48.6524		mean	22.2537	25.3795	17.9181	22.3468	22.044	23.6294	28.3272	20.6724	16.6584		mean	34.6805	36.4191	32.8081	27.868	42.0169	30.1237	44.813	24.8605	39.6203
sd	12.1248	11.8474	12.2751	11.654	12.4993	10.0836	13.1268	13.6135	11.1691		sd	39.2852	39.4808	39.3996	40.1014	38.3917	40.8014	38.2262	39.6775	39.0914		sd	29.0308	28.2292	27.2283	31.3572	26.3456	29.4654	28.9907	34.022	22.8406		sd	19.2554	20.4527	17.8183	16.2367	19.645	18.3935	20.2697	12.4333	19.008
se	0.952617	1.29266	1.38988	1.27155	1.41527	1.45544	2.1878	2.26891	1.72343		se	3.51378	4.75293	5.26499	5.26557	4.69029	6.7077	6.7575	8.65834	6.60765		se	2.30229	3.15612	3.14405	3.4419	2.98305	4.29797	4.90032	5.67034	3.52438		se	1.51285	2.23157	2.01753	1.77157	2.22436	2.65487	3.37828	2.07221	2.933
			TUNEL									TUNEL+ in ED1+
		all		infiltrate		non-infiltrated							all		infiltrate		non-infiltrated
	WM	14.7	1.3	18.4	2.2	12	1.5					WM	25.4	3.2	28.3	4.9	22.8	4.2
	GM	11.5	1.4	11.6	1.7	11.4	2.3					GM	17.9	3.1	16.8	3.5	19.8	5.5

## Sheet: Fig3,4 Tbl2,3 casp3
% casp3	all	WM	GM	non-INF	INF	WM non-INF	WM INF	GM non-INF	GM INF		% ED1 in casp3	sve	WM	GM	non-INF	INF	WM non-INF	WM INF	GM non-INF	GM INF		% casp3 in ED1	all	WM	GM	non-INF	INF	WM non-INF	WM INF	GM non-INF	GM INF
	0	0	0	0	0	0	0	0	0			0	0	0	0	0	0	0	0	0			x0	x0	0	0	0	x0	x0	0	0
	0	0	0	0	0	0	0	0	1.11111			0	0	0	0	0	0	0	0	0			x0	x0	0	0	0	x0	x0	0	0
	0	0	0	0	1.11111	0	1.66667	0	2.04082			0	0	0	0	0	0	0	0	0			x0	x0	0	0	0	x0	x0	0	0
	0	0	0	0	1.66667	0	1.69492	0	2.5			0	0	0	0	0	0	0	0	0			x0	x0	0	0	0	x0	x0	0	0
	0	0	0	0	1.69492	0	1.92308	2.5641	3.27869			0	0	0	0	0	0	0	0	0			x0	x0	0	0	0	x0	x0	0	0
	0	0	0	0	1.92308	0	3.50877	3.84615	6.41026			0	0	0	0	0	0	0	0	0			x0	x0	0	0	0	0	x0	0	0
	0	0	0	0	2.04082	0	3.7037	5	7.5			0	0	0	0	0	0	0	0	0			x0	x0	0	0	0	0	x0	10	0
	0	0	1.11111	0	2.5	0	4.25532	6.45161	7.89474			0	0	0	0	0	0	0	0	0			x0	x0	0	0	0	0	2	14.2857	3.33333
	0	0	2.04082	0	3.27869	0	4.65116	7.14286	11.1111			0	0	0	0	0	0	0	0	0			x0	x0	0	0	0	0	3.57143	14.2857	7.14286
	0	0	2.5	0	3.50877	0	4.65116	7.14286	11.4286			0	0	0	0	0	0	0	0	0			x0	x0	0	0	0	0	5.26316	18.75	10
	0	0	2.5641	0	3.7037	0	6	7.14286	17.1429			0	0	0	0	0	0	0	0	50			x0	x0	0	0	0	0	8.33333	20	17.3913
	0	0	3.27869	0	4.25532	0	7.14286	7.40741	18.9189			0	0	0	0	0	0	0	0	50			x0	x0	0	0	0	0	8.33333	20	20
	0	0	3.57143	0	4.65116	0	7.54717	7.40741	21.9512			0	0	0	0	0	0	0	0	66.6667			0	0	0	0	2	0	10	25	21.4286
	0	0	3.7037	0	4.65116	0	8	7.40741	22.2222			0	0	0	0	0	0	0	0	80			0	0	0	0	3.33333	0	10	25	27.2727
	0	0	3.84615	0	6	0	8.57143	8.69565				0	0	0	0	0	0	0	33.3333	100			0	0	0	0	3.57143	0	10.5263	25	35.2941
	0	0	5	0	6.41026	0	8.98876	9.09091				0	0	0	0	0	0	21.4286	50				0	0	0	0	5.26316	0	12.1951	25	58.3333
	0	0	6.41026	0	7.14286	0	11.1111	9.52381				0	0	0	0	0	0	35	50				0	0	0	0	7.14286	0	12.5	25
	0	0	6.45161	0	7.5	0	13.3333	9.52381				0	0	0	0	0	0	45.4545	50				0	0	3.33333	0	8.33333	0	13.0435	36.3636
	0	1.66667	7.14286	0	7.54717	0	13.8462	10.7143				0	0	0	0	0	0	50	50				0	0	7.14286	0	8.33333	0	14.2857	40
	0	1.69492	7.14286	0	7.89474	2.94118	17.5	11.1111				0	0	0	0	0	0	50	50				0	0	10	0	10	0	18.75	50
	0	1.92308	7.40741	0	8	3.7037	17.8082	11.1111				0	0	0	0	0	0	50	50				0	0	10	0	10	0	21.2121	62.5
	0	2.94118	7.40741	0	8.57143	4.34783	20	12.5				0	0	0	0	0	0	53.8462	80				0	0	14.2857	0	10	0	23.8095	66.6667
	0	3.50877	7.40741	0	8.98876	4.54545	21.9512	14.2857				0	0	0	0	0	0	66.6667	100				0	0	14.2857	0	10.5263	0	25
	0	3.7037	7.5	2.5641	11.1111	4.7619	25	14.8148				0	0	0	0	0	0	77.5	100				0	0	14.2857	0	12.1951	0	25.9259
	0	3.7037	7.69231	2.94118	11.4286	4.7619	32.2581	15.7895				0	0	0	0	21.4286	0	100	100				0	0	17.3913	0	12.5	0	28.5714
	1.11111	4.25532	7.89474	3.57143	13.3333	5.88235	33.3333	16.6667				0	0	0	0	35	0	100	100				0	0	18.75	0	13.0435	0	35.2941
	1.66667	4.34783	8.69565	3.7037	13.8462	6.06061	40.4762	20				0	0	0	0	45.4545	0	100	100				0	0	20	0	14.2857	0	46.6667
	1.69492	4.54545	9.09091	3.7037	17.1429	6.25	75.4717	21.7391				0	0	0	0	50	0	100	100				0	0	20	0	17.3913	0	86.1111
	1.92308	4.65116	9.52381	3.84615	17.5	6.25		23.5294				0	0	0	0	50	0		100				0	0	21.4286	0	18.75	0
	2.04082	4.65116	9.52381	4.34783	17.8082	7.14286						0	0	0	0	50	0		100				0	0	25	0	20	0
	2.5	4.7619	10.7143	4.54545	18.9189	7.14286						0	0	33.3333	0	50	0		100				0	0	25	0	21.2121	0
	2.5641	4.7619	10.7143	4.7619	20	7.40741						0	0	50	0	50	0						0	0	25	0	21.4286	8.33333
	2.94118	5.88235	11.1111	4.7619	21.9512	7.69231						0	0	50	0	53.8462	0						0	0	25	0	23.8095	9.09091
	3.27869	6	11.1111	5	22.2222	7.69231						0	0	50	0	66.6667	0						0	0	27.2727	0	25	9.09091
	3.50877	6.06061	11.4286	5.88235	22.6667	8.10811						0	0	50	0	77.5	0						0	0	28.5714	0	25.9259	11.1111
	3.57143	6.25	11.4286	6.06061	23.8095	8.82353						0	0	50	0	80	0						0	2	33.3333	0	27.2727	16.6667
	3.7037	6.25	12.5	6.25	25	9.7561						0	0	50	0	100	0						0	3.57143	40	0	28.5714	20
	3.7037	7.14286	14.8148	6.25	32.2581	10.5263						0	0	80	0	100	0						0	5.26316	50	0	35.2941	20
	3.7037	7.14286	15.7895	6.45161	32.4324	11.1111						0	0	100	0	100	0						0	8.33333	58.3333	0	46.6667	21.2121
	3.84615	7.14286	16.6667	7.14286	33.3333	11.1111						0	0	100	0	100	21.4286						0	8.33333	60	0	58.3333	22.2222
	4.25532	7.40741	17.1429	7.14286	40.4762	11.1111						0	0	100	0	100	33.3333						0	9.09091	62.5	8.33333	85.7143	23.8095
	4.34783	7.54717	18.9189	7.14286	43.3962	14.2857						0	0	100	0	100	35						0	9.09091	66.6667	9.09091	86.1111	25
	4.54545	7.69231	20	7.14286		15						0	0	100	0	100	45.4545						0	10	66.6667	9.09091	90.4762	33.3333
	4.65116	7.69231	20	7.40741		16.2162						0	0	100	0		50						0	10		10		33.3333
	4.65116	8	21.7391	7.40741		16.6667						0	0	100	0		50						0	10.5263		11.1111		33.3333
	4.7619	8.10811	22.2222	7.40741		16.6667						0	0	100	0		50						0	11.1111		14.2857		36.3636
	4.7619	8.57143	22.6667	7.40741		17.5						0	0	100	0		80						0	12.1951		14.2857		40
	5	8.82353	23.5294	7.69231		17.6471						0	0	100	0		100						0	12.5		14.2857		50
	5.88235	8.98876	23.8095	7.69231		18.0219						0	0	100	0		100						0	13.0435		16.6667		50
	6	9.7561		7.69231		19.3548						0	0	100	0		100						0	14.2857		18.75		50
	6.06061	10.5263		8.10811		20						0	21.4286	100	0		100						0	16.6667		20		57.1429
	6.25	11.1111		8.69565		20						0	33.3333	100	0		100						0	18.75		20		60
	6.25	11.1111		8.82353		22.2222						0	35	100	0		100						2	20		20		66.6667
	6.41026	11.1111		9.09091		25						0	45.4545	100	0		100						3.33333	20		21.2121		66.6667
	6.45161	11.1111		9.52381		25						0	50		0		100						3.57143	21.2121		22.2222		87.5
	7.14286	13.3333		9.52381		30						0	50		0		100						5.26316	22.2222		23.8095		100
	7.14286	13.8462		9.7561		30						0	50		21.4286		100						7.14286	23.8095		25		100
	7.14286	14.2857		10.5263		32.2581						0	50		33.3333		100						8.33333	25		25		100
	7.14286	15		10.7143		42.1053						0	50		33.3333								8.33333	25		25
	7.14286	16.2162		10.7143		43.2432						0	50		35								9.09091	25.9259		25
	7.40741	16.6667		11.1111								0	53.8462		45.4545								9.09091	28.5714		25
	7.40741	17.5		11.1111								0	66.6667		50								10	33.3333		33.3333
	7.40741	17.6471		11.1111								0	77.5		50								10	33.3333		33.3333
	7.40741	17.8082		11.1111								0	80		50								10	35.2941		33.3333
	7.5	19.3548		11.1111								0	100		50								10	36.3636		36.3636
	7.54717	20		12.5								0	100		50								10.5263	40		40
	7.69231	20		14.2857								0	100		50								11.1111	46.6667		40
	7.69231	21.9512		14.8148								0	100		50								12.1951	50		50
	7.69231	22.2222		15								0	100		80								12.5	50		50
	7.89474	25		15.7895								0	100		100								13.0435	50		50
	8	25		16.2162								0	100		100								14.2857	57.1429		50
	8.10811	30		16.6667								0	100		100								14.2857	66.6667		57.1429
	8.57143	32.2581		16.6667								0	100		100								14.2857	86.1111		60
	8.69565	33.3333		17.5								0	100		100								14.2857	87.5		62.5
	8.82353	40.4762		17.6471								0	100		100								16.6667	100		66.6667
	8.98876	42.1053		19.3548								0	100		100								17.3913	100		66.6667
	9.09091	43.2432		20								0	100		100								18.75	100		66.6667
	9.52381	75.4717		20								0			100								18.75			80
	9.52381			20								0			100								20			83.3333
	9.7561			21.7391								0			100								20			83.3333
	10.5263			22.2222								21.4286			100								20			87.5
	10.7143			23.5294								33.3333			100								20			100
	10.7143			25								33.3333			100								21.2121			100
	11.1111			25								35			100								21.4286			100
	11.1111			25								45.4545			100								22.2222
	11.1111			25								50			100								23.8095
	11.1111			30								50			100								25
	11.1111			30								50			100								25
	11.4286			32.2581								50			100								25
	11.4286			42.1053								50			100								25
	12.5			43.2432								50											25
	13.3333											50											25
	13.8462											50											25.9259
	14.2857											50											27.2727
	14.8148											50											28.5714
	15											50											28.5714
	15.7895											50											33.3333
	16.2162											53.8462											33.3333
	16.6667											66.6667											33.3333
	16.6667											77.5											35.2941
	17.1429											80											36.3636
	17.5											80											40
	17.6471											100											40
	17.8082											100											46.6667
	18.9189											100											50
	19.3548											100											50
	20											100											50
	20											100											50
	20											100											57.1429
	20											100											58.3333
	21.7391											100											60
	21.9512											100											62.5
	22.2222											100											66.6667
	22.2222											100											66.6667
	22.6667											100											66.6667
	23.5294											100											80
	23.8095											100
	25											100
	25											100
	25											100											86.1111
	25											100											87.5
	30											100
	30											100											100
	32.2581											100											100
	32.4324											100											100
	33.3333											100
	40.4762											100
	42.1053											100
	43.2432											100
	43.3962											100
	75.4717											100
% casp3	all	WM	GM	non-INF	INF	WM non-INF	WM INF	GM non-INF	GM INF		% ED1 in casp3	all	WM	GM	non-INF	INF	WM non-INF	WM INF	GM non-INF	GM INF		% casp-3 in ED1	all	WM	GM	non-INF	INF	WM non-INF	WM INF	GM non-INF	GM INF
n	131	78	54	91	43	60	28	28	31		n	131	78	54	91	43	60	28	28	31		n	131	77	54	90	43	58	28	31	18
mean	10.9252	10.6829	9.24928	9.76364	12.897	9.97197	14.0855	9.33133	9.53646		mean	30.7371	26.1458	37.284	29.9839	30.9278	25.2624	30.3534	42.3656	23.1111		mean	20.2125	20.9064	17.7732	21.5276	17.7322	21.7147	20.0663	21.7205	12.5123
sd	11.6084	12.8103	7.16353	9.662	11.4341	10.7966	16.1164	6.31047	7.79746		sd	41.9118	39.2318	45.0254	42.2618	39.3003	40.1197	37.9098	43.5396	35.6897		sd	25.4069	27.266	20.8587	28.7307	23.3893	29.6605	18.759	19.7346	16.7553
se	1.01423	1.45048	0.974833	1.01285	1.74368	1.39384	3.04571	1.19257	1.40046		se	3.66185	4.44212	6.12718	4.43024	5.99324	5.17943	7.16428	8.22822	6.41006		se	2.21981	3.10725	2.83851	3.02848	3.56683	3.89462	3.54512	3.54444	3.94927
		casp-3
		all		infiltrate		non-infiltrated								casp-3+ in ED1+
	WM	10.7	1.5	14.1	3	10	1.3							all		infiltrate		non-infiltrated
	GM	9.2	1	9.9	1.3	9.3	1.2						WM	20.9	3.1	18.6	3.5	21.6	3.8
													GM	17.8	2.8	11.5	3.8	21.2	3.4

## Sheet: Tbl2 casp-3 u TUNEL
% casp3 in TUNEL	all	WM	GM	non-INF	INF	WM non-INF	WM INF	GM non-INF	GM INF
	0	0	0	0	0	0	0	0	0
	0	0	0	0	0	0	33.3333	50	50
	0	0	50	0	33.3333	0	42.8571	50	80
	0	0	50	0	42.8571	0	62.5	100	100
	0	0	50	0	50	0	66.6667	100	100
	0	0	80	0	62.5	0	66.6667	100	100
	0	0	100	0	66.6667	0	66.6667	100	100
	0	33.3333	100	0	66.6667	33.3333	75	0	0
	0	33.3333	100	33.3333	66.6667	50	90.9091	50	50
	33.3333	42.8571	100	50	75	50	90.9091	50	80
	33.3333	50	100	50	80	50	92.8571	100	100
	42.8571	50	100	50	90.9091	66.6667	100	100	100
	50	50	100	50	90.9091	75	100	100	100
	50	62.5	100	50	92.8571	75	100	100	100
	50	66.6667		66.6667	100	77.7778	100
	50	66.6667		75	100	100	100
	50	66.6667		75	100	100	100
	50	66.6667		77.7778	100	100
	62.5	75		100	100	100
	66.6667	75		100	100	100
	66.6667	77.7778		100	100	100
	66.6667	90.9091		100	100	100
	66.6667	90.9091		100	100	100
	75	92.8571		100	100	100
	75	100		100		100
	77.7778	100		100		100
	80	100		100		100
	90.9091	100		100		100
	90.9091	100		100		100
	92.8571	100		100		100
	100	100		100
	100	100		100
	100	100		100
	100	100		100
	100	100		100
	100	100		100
	100	100		100
	100	100
	100	100
	100	100
	100	100
	100	100
	100	100
	100	100
	100	100
	100
	100
	100
	100
	100
	100
	100
	100
	100
	100
	100
	100
	100
	100
% casp3 u TUNEL	all	WM	GM	non-INF	INF	WM non-INF	WM INF	GM non-INF	GM INF
n	59	45	14	37	24	30	17	14	14
mean	71.5448	70.9143	73.5714	66.967	75.7652	65.9259	75.7862	71.4286	75.7143
sd	36.5761	36.7411	37.3357	40.629	30.9943	41.5095	28.8568	37.7964	36.7349
se	4.7618	5.47704	9.97839	6.67936	6.32669	7.57856	6.9988	10.1015	9.81781
